# Supplementary material for: Mutations in the Heme Exporter FLVCR1 Cause Sensory Neurodegeneration with Loss of Pain Perception
Source: PubMed Central journal article supplement (PMC5140052; doi:10.1371/journal.pgen.1006461), 2016-12-06
Supplement: pgen.1006461.s008.pdf [file pgen.1006461.s008.pdf]

| <b>Gene Name</b> | <b>Forward Primer</b>  | <b>Reverse Primer</b>   | <b>Probe<br/>(Universal Probe Library-Roche)</b> |
|------------------|------------------------|-------------------------|--------------------------------------------------|
| ALAS1            | GAAATGAATGCCGTGAGGAA   | CCTCCATCGGTTTTCACT      | #40                                              |
| HO1              | GGGTGATAGAAGAGGCCAAGA  | AGCTCCTGCAACTCCTCAA     | #42                                              |
| FPN              | GCTCTAGCTGTGAAAGCTGGTC | AGTTCCTCCAGGGGTTTT      | #35                                              |
| FT-H             | GCCAGAACTACCACCAGGAC   | CATCATCGCGGTCAAAGTAG    | #1                                               |
| FT-L             | GCTGAACCAGGCCCTTTT     | TCCAGGAAGTACAGAGATGG    | #37                                              |
| DMT1             | CATGCTGGCCTTTTCCTAA    | AACATCCCAGCACAAACACC    | #76                                              |
| SOD1             | TCATCAATTCGAGCAGAAGG   | GCAGGCCTTCAGTCAGTCC     | #60                                              |
| SOD2             | AATCAGGATCCACTGCAAGG   | TAAGCGTGCTCCACACAT      | #3                                               |
| CATALASE         | TCATCAGGGATCCCATATTGTT | CCTTCAGATGTGTCTGAGGATTT | #76                                              |
| THIOREDOXIN1     | TGAGGAGAAAGCTGTGGAGAA  | CCATTCCAATGGCCAAAA      | #60                                              |

**Table S3**
