# Supplementary material for: Mutations in the Heme Exporter FLVCR1 Cause Sensory Neurodegeneration with Loss of Pain Perception
Source: PubMed Central journal article supplement (PMC5140052; doi:10.1371/journal.pgen.1006461), 2016-12-06
Supplement: pgen.1006461.s009.pdf [file pgen.1006461.s009.pdf]

| <b>Gene</b> | <b>Forward Primer</b>     | <b>Reverse Primer</b>   | <b>Probe</b>                   |
|-------------|---------------------------|-------------------------|--------------------------------|
| FLVCR1a     | TTGGGCCCAAAGAGGTGTC       | GCCAGGAGATTTGTGTCATTCTG | 6FAM-ACCACCAGTTTTAGTACCCAA-MGB |
| FLVCR1b     | TCCTCTTATGTTCTGTTAATTGCCA | GCCAGGAGATTTGTGTCATTCTG | 6FAM-ACCACCAGTTTTAGTACCCAA-MGB |

**Table S4**
